# Supplementary material for: Cutaneous and Developmental Effects of CARD14 Overexpression in Zebrafish
Source: MDPI journal article supplement (doi:10.3390/biomedicines10123192), 2022-12-08
Supplement: s1 [file s1]

# Cutaneous and Developmental Effects of *CARD14* Overexpression in Zebrafish

Avital Baniel <sup>1,\*</sup>, Limor Ziv <sup>2</sup>, Zohar Ben-Moshe <sup>3</sup>, Ofer Sarig <sup>1</sup>, Janan Mohamad <sup>1,4</sup>, Alon Peled <sup>1</sup>, Gideon Rechavi <sup>2</sup>, Yoav Gothilf <sup>3</sup> and Eli Sprecher <sup>1,4</sup>

<sup>1</sup> Division of Dermatology, Tel Aviv Sourasky Medical Center, Tel Aviv 64239, Israel

<sup>2</sup> Cancer Research Center, Sheba Medical Center, Ramat Gan 52620, Israel

<sup>3</sup> Department of Neurobiology, The George S. Wise Faculty of Life Sciences, Tel-Aviv University, Tel Aviv 6997801, Israel

<sup>4</sup> Department of Human Molecular Genetics and Biochemistry, Sackler Faculty of Medicine, Tel-Aviv University, Tel Aviv 6997801, Israel

\* Correspondence: avital.baniel@gmail.com

**Table S1.** Riboprobes used for WISH.

|                    |                             |
|--------------------|-----------------------------|
| <b>krtt1c19e_F</b> | <b>TCAGTGACCTCAACATGGGC</b> |
| krtt1c19e_R        | ATCTCCATCTCCAGCCTGGT        |
| cyt1_F             | GCACCCAGATGAGTGACAA         |
| cyt1_R             | CCATCCACCACCTCTTCCAC        |
| krt8_F             | ACTGGCAACTGGAATCAAGG        |
| krt8_R             | GCACGACAAGAGTGGTGAGA        |

**Table S2.** Oligonucleotides used for qPCR.

|                 |                             |
|-----------------|-----------------------------|
| <b>vangl1_F</b> | <b>TACTGACACTCCTCCTGCTG</b> |
| vangl1_R        | GCAGAGCATCCACCAGTGAT        |
| vangl2_F        | CAGCCGCTTCTACAATGTGG        |
| vangl2_R        | TGGATTTGGGCAGGTTGAGT        |
| nfk2_F          | AAGCCTGTTGTGTCCAATCC        |
| nfk2_R          | CTTCTCCTCCCAGCACTGAC        |
| daam1b_F        | AACTCGTCAAGCAGCAAGTG        |
| daam1b_R        | AGAGGACCAGAGACAGGAGG        |
| ppiab_F         | TCACACTGAAACACGGAGGCA       |
| ppiab_R         | GCTTACCGTCCAGCCAGTTG        |
